# Supplementary material
Source: PubMed Central journal article supplement (PMC3415533)
Supplement: mmc1.pdf [file mmc1.pdf]

Supplemental Data

A Single Recurrent Mutation in the 5-UTR of *IFITM5* Causes Osteogenesis Imperfecta Type V

Tae-Joon Cho, Kyung-Eun Lee, Sook-Kyung Lee, Su Jeong Song, Kyung Jin Kim, Daehyun Jeon, Gene Lee, Ha-Neui Kim, Hye Ran Lee, Hye-Hyun Eom, Zang Hee Lee, Ok-Hwa Kim, Woong-Yang Park, Sung Sup Park, Shiro Ikegawa, Won Joon Yoo, In Ho Choi, and Jung-Wook Kim

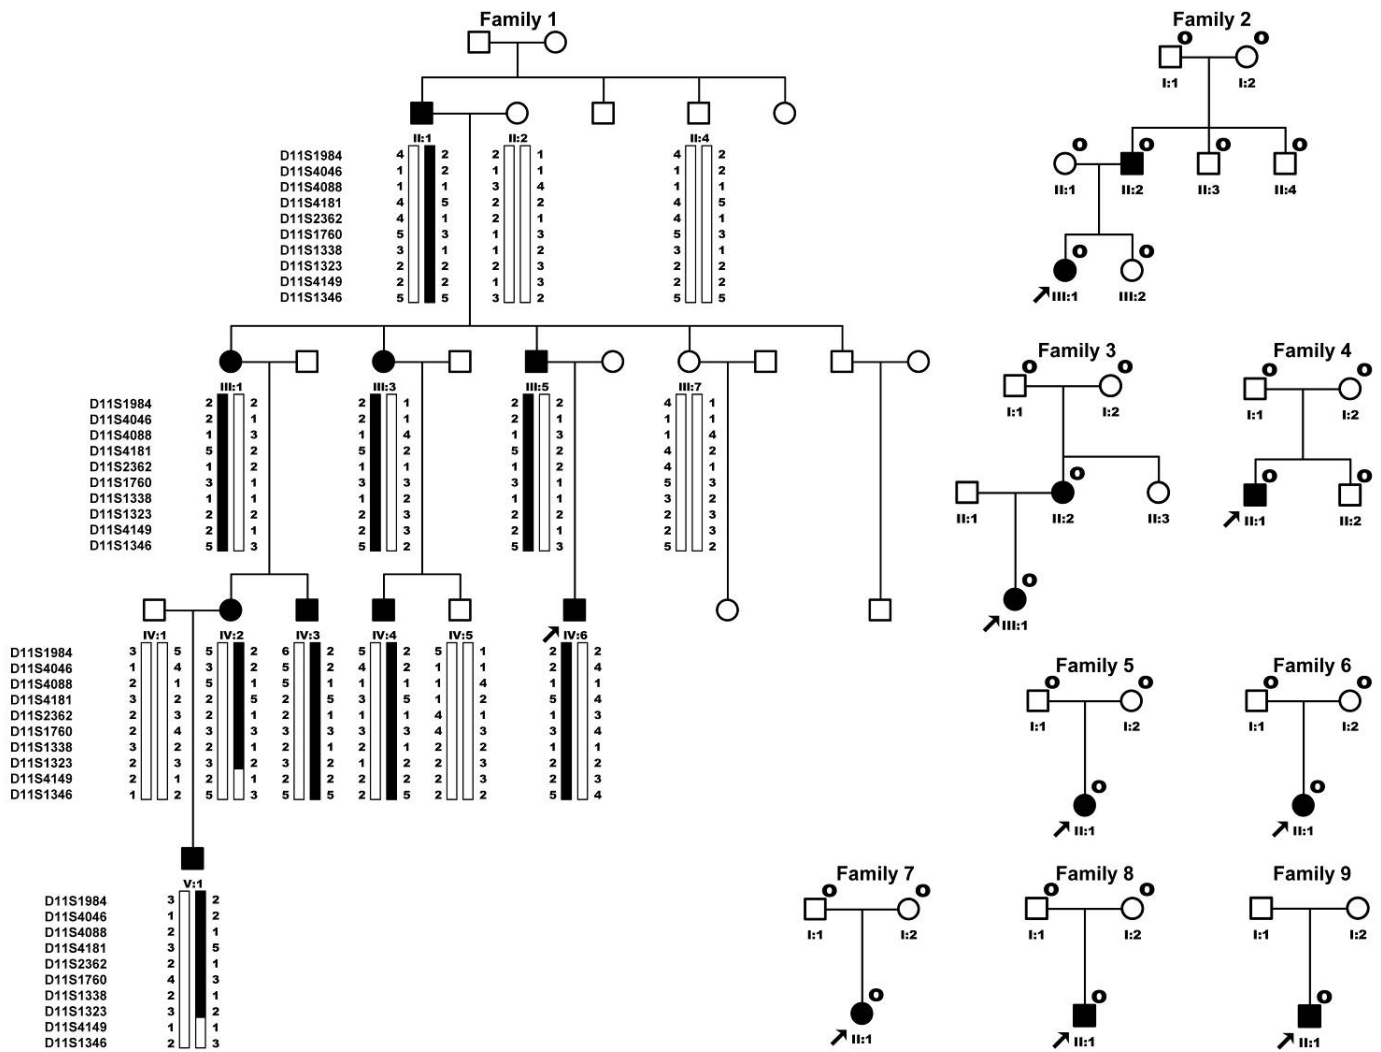

**Figure S1. Pedigrees of three familial cases and six simplex individuals.** Marker haplotypes on chromosome 11pter-11p15.4 linked to OI type V are indicated by the black bar. In each haplotype pair, paternal haplotypes are to the left and maternal to the right. Mark “o” denotes individuals of families 2 to 9 included in this study.

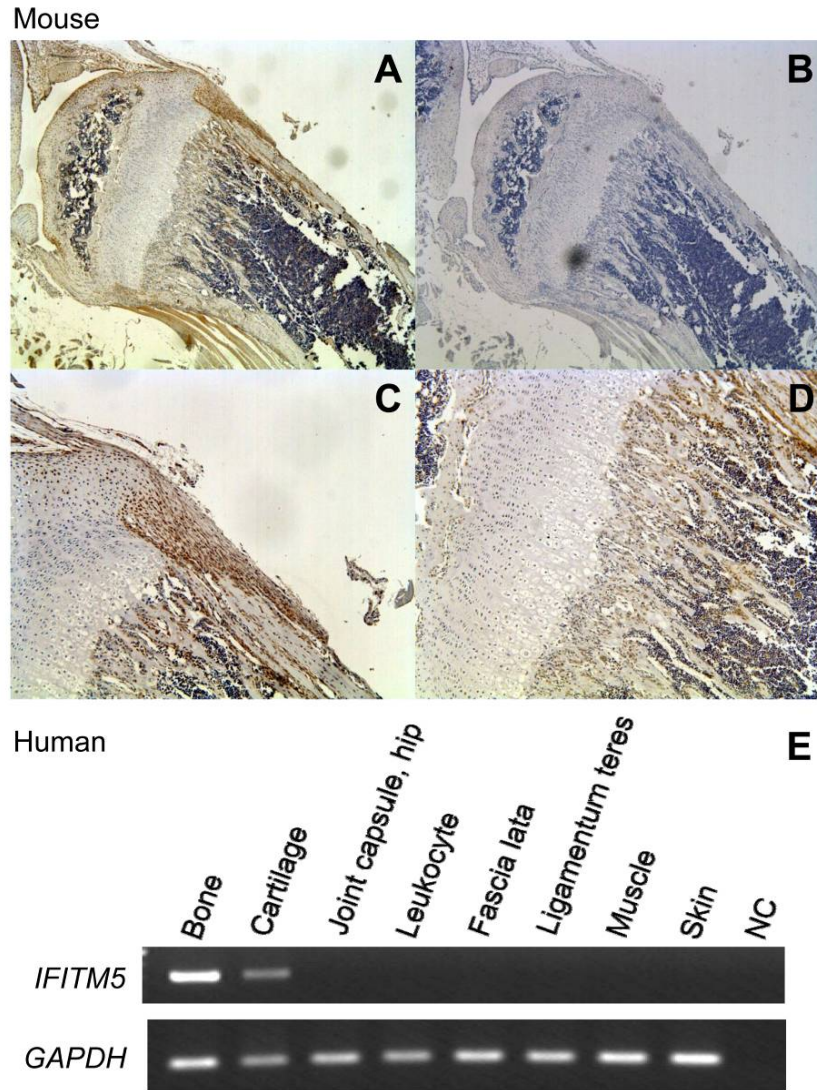

**Figure S2. Spatial pattern of the *Ifitm5* expression and protein localization.** (A) Immunohistochemical study at the proximal tibia of a 3-week-old BALB/c mouse (x40). (B) Negative control performed without primary antibody (x40). (C) *Ifitm5* immunoreactivity was observed at the periphyseal fibro-chondro-osseous structure (the groove of Ranvier and the ring of LaCroix), the superficial layer of articular cartilage, and the deep layer of periosteum (x100). (D) *Ifitm5* immunoreactivity was observed at osteoblasts lining the metaphyseal trabeculae and cortical bones, while physal chondrocytes did not show any immunoreactivity (x100). HRP-conjugated anti-rabbit secondary antibody was used, and the section was counterstained with Mayer's hematoxylin. (E) RT-PCR showed the mRNA expression of *IFITM5* was restricted to bone and cartilage in human tissues. NC: negative control performed without reverse transcription.

**Table S1. Two-point LOD scores of the locus associated with family 1.**

| Marker   | $\Theta$ at<br>Maximum<br>LOD | $\Theta$ |      |      |      |      |      |      |
|----------|-------------------------------|----------|------|------|------|------|------|------|
|          |                               | 0.0      | 0.05 | 0.10 | 0.15 | 0.20 | 0.30 | 0.40 |
| D11S1984 | 0                             | 1.66     | 1.53 | 1.40 | 1.25 | 1.08 | 0.71 | 0.33 |
| D11S4046 | 0                             | 2.52     | 2.34 | 2.14 | 1.92 | 1.68 | 1.15 | 0.56 |
| D11S4088 | 0                             | 1.65     | 1.54 | 1.43 | 1.30 | 1.16 | 0.84 | 0.46 |
| D11S4181 | 0                             | 2.07     | 1.91 | 1.73 | 1.52 | 1.31 | 0.83 | 0.36 |
| D11S2362 | 0                             | 1.33     | 1.19 | 1.04 | 0.88 | 0.71 | 0.38 | 0.11 |
| D11S1760 | 0                             | 1.71     | 1.57 | 1.43 | 1.27 | 1.10 | 0.72 | 0.33 |
| D11S1338 | 0                             | 1.53     | 1.41 | 1.28 | 1.14 | 0.99 | 0.64 | 0.28 |
| D11S1323 | 0                             | 0.36     | 0.34 | 0.32 | 0.30 | 0.27 | 0.20 | 0.11 |
| D11S4149 | 0.2                           | 0.24     | 0.45 | 0.53 | 0.54 | 0.52 | 0.38 | 0.15 |
| D11S1346 | 0.2                           | 0.12     | 0.34 | 0.44 | 0.47 | 0.45 | 0.34 | 0.14 |

**Table S2. Statistics for exome sequencing.**

| Exome Capture Statistics                        | Family 4-II:1 | Family 4-I:2 | Family 4-I:1 | Family 4-II:2 |
|-------------------------------------------------|---------------|--------------|--------------|---------------|
| Initial bases on target(bp)                     | 31083979      | 31083979     | 31083979     | 31083979      |
| Total Reads                                     | 45981933      | 56877926     | 31723002     | 45836077      |
| Mapped Reads                                    | 45701860      | 56592973     | 31547247     | 45590307      |
| Mapping Rate                                    | 99.39%        | 99.50%       | 99.45%       | 99.46%        |
| Total effective reads                           | 45519504      | 56355056     | 31425950     | 45371728      |
| Total effective yield(Mb)                       | 4096.76       | 5071.96      | 2828.34      | 4083.46       |
| Read length(bp)                                 | 90            | 90           | 90           | 90            |
| Average sequencing depth on target              | 42.38         | 52.75        | 29.24        | 44.08         |
| Base covered on target(bp)                      | 29558890      | 29682032     | 29419875     | 29633635      |
| Coverage of target region(%)                    | 95.09%        | 95.49%       | 94.65%       | 95.33%        |
| Fraction of target covered with at least 20X    | 23036590      | 25111173     | 19349012     | 23791778      |
| Fraction of target covered with at least 20X(%) | 74.11%        | 80.78%       | 62.25%       | 76.54%        |
| Fraction of target covered with at least 10X    | 26721632      | 27653878     | 25360598     | 27166414      |
| Fraction of target covered with at least 10X(%) | 85.97%        | 88.97%       | 81.59%       | 87.40%        |
| Fraction of target covered with at least 4X     | 28562051      | 28927747     | 28148492     | 28767057      |
| Fraction of target covered with at least 4X(%)  | 91.89%        | 93.06%       | 90.56%       | 92.55%        |

**Table S3. Variations unique to the proband in the linked region.**

| Chrom-osome | Start   | End     | Referece sequence | Observed sequence | Genotype | Function       | Gene             | MIM No. |
|-------------|---------|---------|-------------------|-------------------|----------|----------------|------------------|---------|
| Chr11       | 299504  | 299504  | G                 | A                 | hetero   | UTR5           | <i>IFITM5</i>    |         |
| Chr11       | 574335  | 574335  | G                 | A                 | hetero   | ncRNA_exonic   | <i>LOC143666</i> |         |
| Chr11       | 1253980 | 1253980 | A                 | G                 | hetero   | exonic         | <i>MUC5B</i>     | 600770  |
| Chr11       | 1687777 | 1687777 | C                 | -                 | homo     | ncRNA_intronic | <i>FAM99A</i>    |         |
| Chr11       | 2720740 | 2720740 | C                 | G                 | hetero   | ncRNA_exonic   | <i>KCNQ1OT1</i>  | 604115  |
| Chr11       | 5729944 | 5729947 | TTCT              | -                 | hetero   | intronic       | <i>TRIM22</i>    | 606559  |
| Chr11       | 8126492 | 8126492 | -                 | C                 | hetero   | UTR3           | <i>TUB</i>       | 601197  |
| Chr11       | 9111536 | 9111536 | C                 | T                 | hetero   | intronic       | <i>SCUBE2</i>    | 611747  |

**Table S4. Primers used in this study.**

| Usage                | Gene                                    | Direction | Sequence                            | Amplicon size (bp) | Note                           |
|----------------------|-----------------------------------------|-----------|-------------------------------------|--------------------|--------------------------------|
| Sanger sequencing    | <i>IFITM5</i>                           | F         | 5'-CCGCAGGCTGTAATTTGTG-3'           | 452                | Exon 1                         |
|                      |                                         | R         | 5'-CCCTCACGGACAAGCAGAG-3'           |                    |                                |
|                      | <i>IFITM5</i>                           | F         | 5'-AGATTTTGGGTGCAGTAGGG-3'          | 490                | Exon 2                         |
|                      |                                         | R         | 5'-CCTTAGGTGCCCATGTTGG-3'           |                    |                                |
|                      | <i>IFITM5</i>                           | F         | 5'-TGACGCGGACTATGACTGAC-3'          | 395                | Exon 2                         |
|                      |                                         | R         | 5'-CTGTGGCATTGGCTTTGG-3'            |                    |                                |
| Cloning <sup>a</sup> | <i>IFITM5</i>                           | F         | 5'-GAAGCTTCAGTCTGAGTGTGGAAGAGACG-3' | 455                | <i>HindIII</i><br><i>BamHI</i> |
|                      |                                         | R         | 5'-GGGATCCCCAGCCTGCCAGTCATAGTCCG-3' |                    |                                |
| Mutagenesis          | <i>IFITM5</i><br>( <i>c.2T&gt;C</i> )   | F         | 5'-GGCGCTGGAACCCACGGACACGGCGT-3'    |                    |                                |
|                      |                                         | R         | 5'-ACGCCGTGTCCGTGGGTTCAGCGCC-3'     |                    |                                |
|                      | <i>IFITM5</i><br>( <i>c.-14C&gt;T</i> ) | F         | 5'-GTGTGGAAGAGATGGCGCTGGAACCC-3'    |                    |                                |
|                      |                                         | R         | 5'-GGGTTCAGCGCCATCTCTTCCACAC-3'     |                    |                                |
| RT-PCR               | <i>IFITM5</i>                           | F         | 5'-TTGATCTGGTCGGTGTTTCAG-3'         | 292                | Exon 1-2                       |
|                      |                                         | R         | 5'-GTCAGTCATAGTCCGCGTCA-3'          |                    |                                |
|                      | <i>GAPDH</i>                            | F         | 5'-ACCGTCAAGGCTGAGAACGGGA-3'        | 139                | Exon 4-6                       |
|                      |                                         | R         | 5'-TGGTGGTGAAGACGCCAGTGGA-3'        |                    |                                |

F: forward, R: reverse

<sup>a</sup> *HindIII* and *BamHI* sequences were introduced into the cloned PCR product for subsequent subcloning
